# Supplementary material for: Probiotics and Human Milk Differentially Influence the Gut Microbiome and NEC Incidence in Preterm Pigs
Source: MDPI journal article supplement (doi:10.3390/nu15112585), 2023-05-31
Supplement: s1 [file s1]

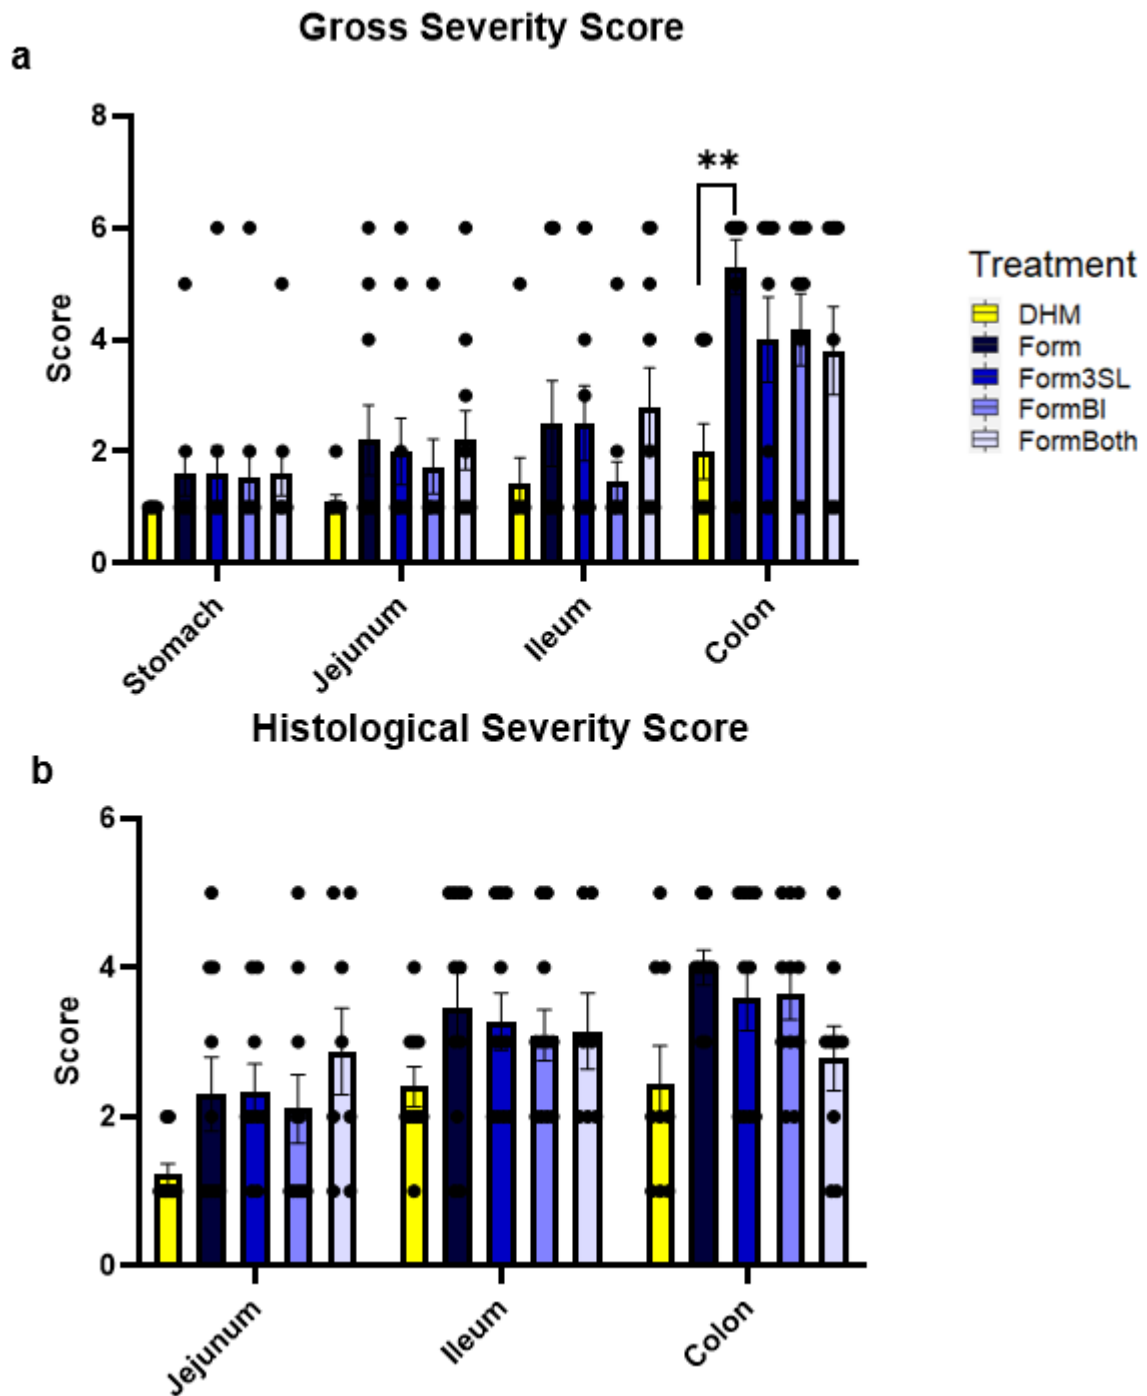

**Supplementary Figure S1.** Phenotypic study outcomes. **(a)** Gross severity score by intestinal segment. P-value was determined using a Two-way ANOVA, Tukey's multiple comparisons test; \*\*:p-value  $\leq$  0.01 between DHM and FormBoth. **(b)** Histological severity score by intestinal segment.

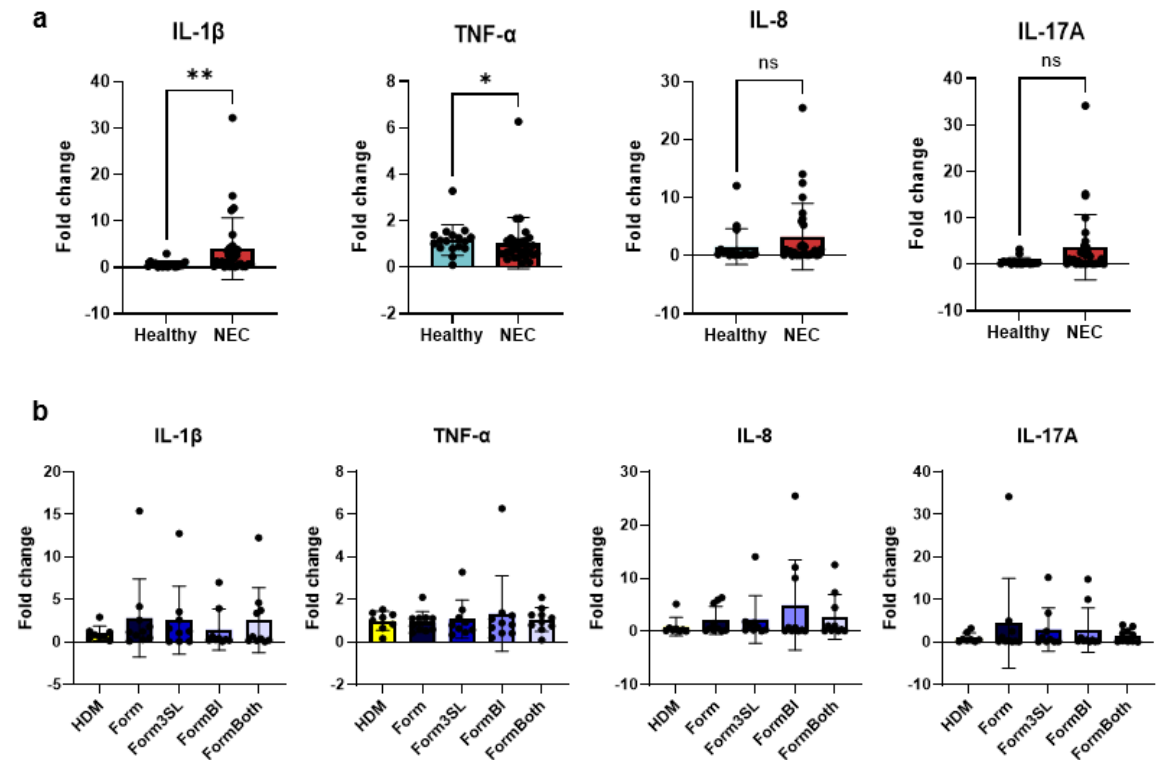

**Supplementary Figure S2.** Pro-inflammatory cytokine expression analysis in distal ileum tissue. **(a)** Fold change in expression of IL-1 $\beta$ , TNF- $\alpha$ , IL-8, and IL-7a in healthy vs NEC piglets. **(b)** Fold change in expression of IL-1 $\beta$ , TNF- $\alpha$ , IL-8, and IL-7a in all treatment groups (HDM (n= 8), Form (n=10), Form3SL (n=9), FormBoth (n=10), FormBI (n=9)).

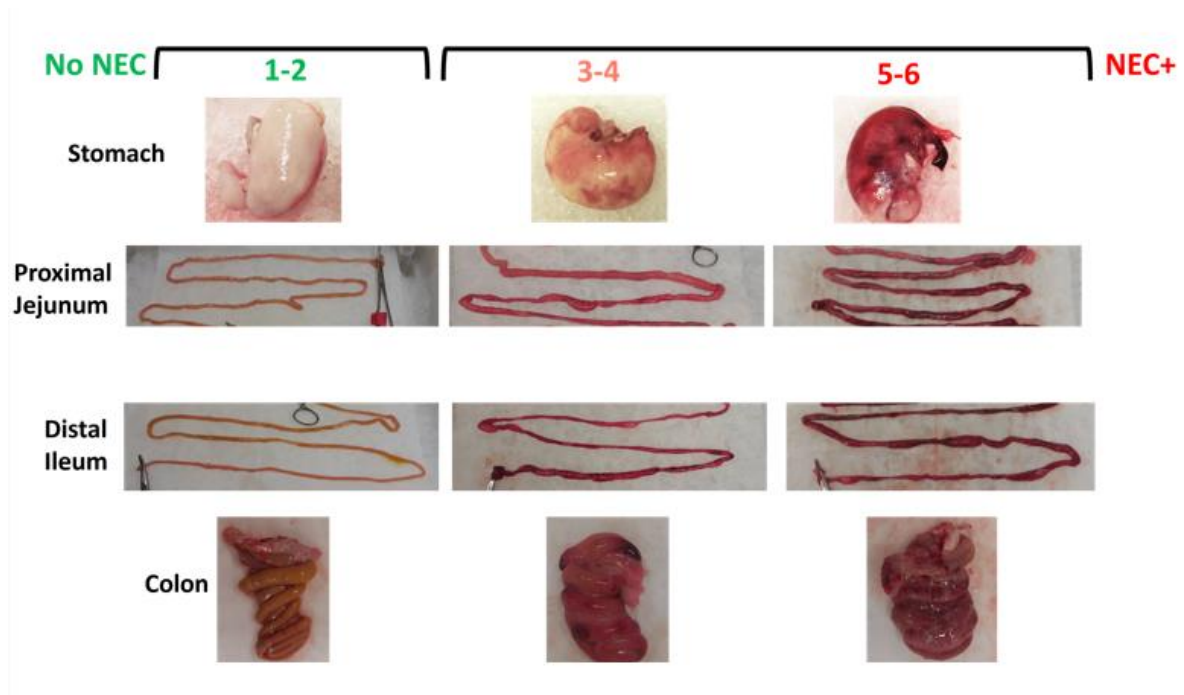

**Supplementary Figure S3.** Representative images and scoring of gross NEC severity score.

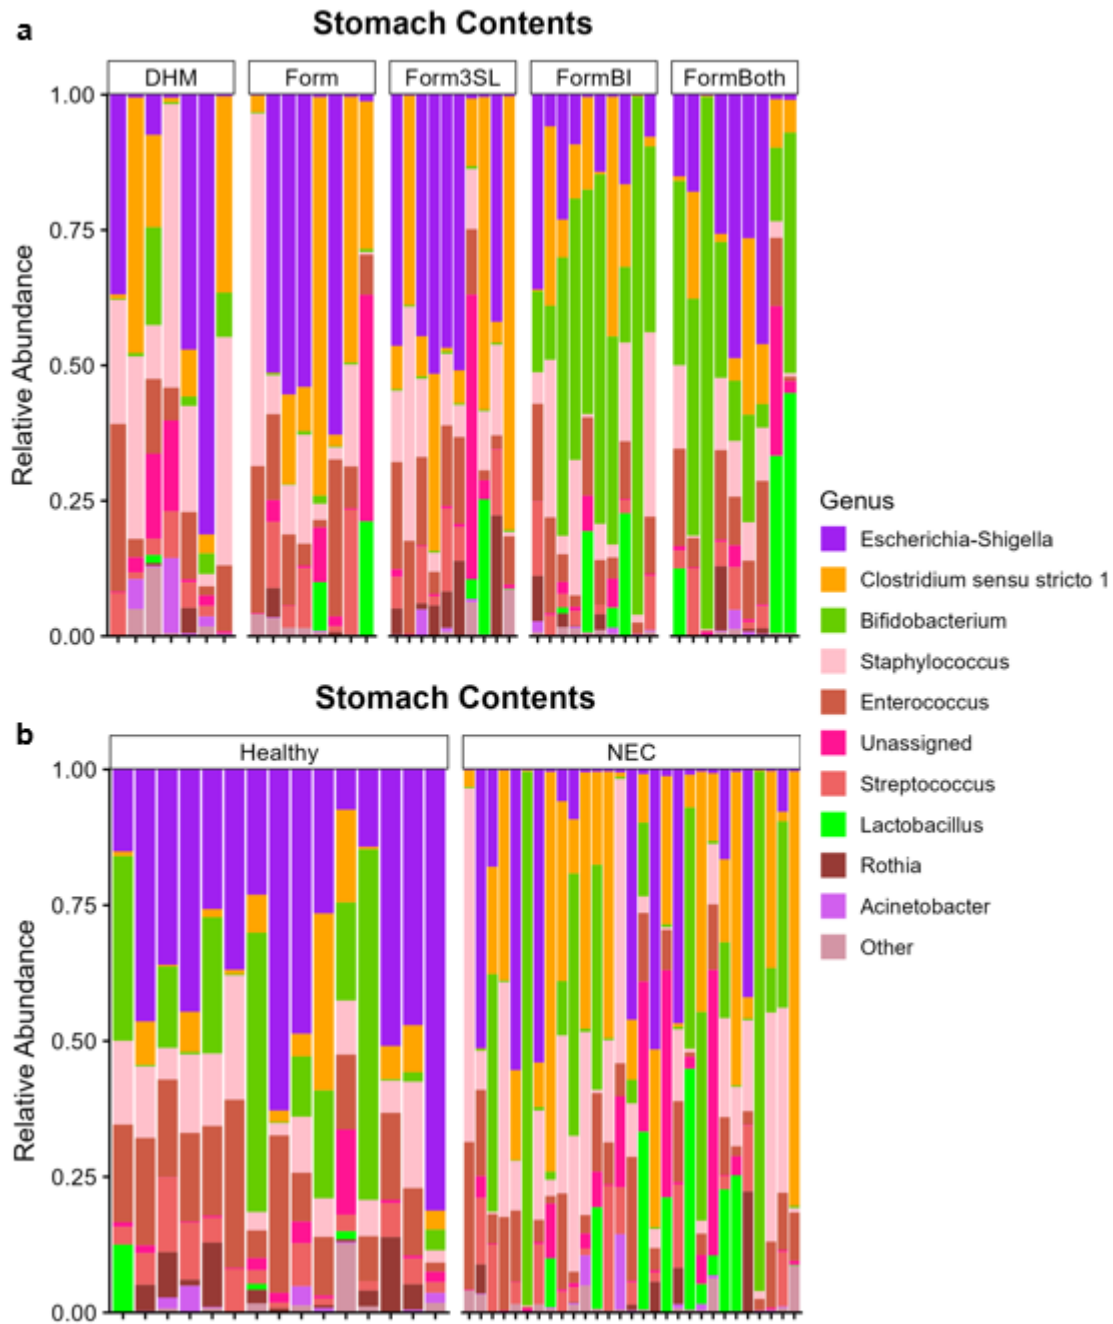

**Supplementary Figure S4.** Relative abundance by 16S sequencing of top 10 genera in stomach contents. (a) Relative abundance of top 10 genera in all treatment groups (DHM (n=9), Form (n=8), Form3SL (n=9), FormBI (n=11), and FormBoth (n=10)). (b) Relative abundance of top 10 genera in NEC (n=31) vs healthy (n=15) piglets.

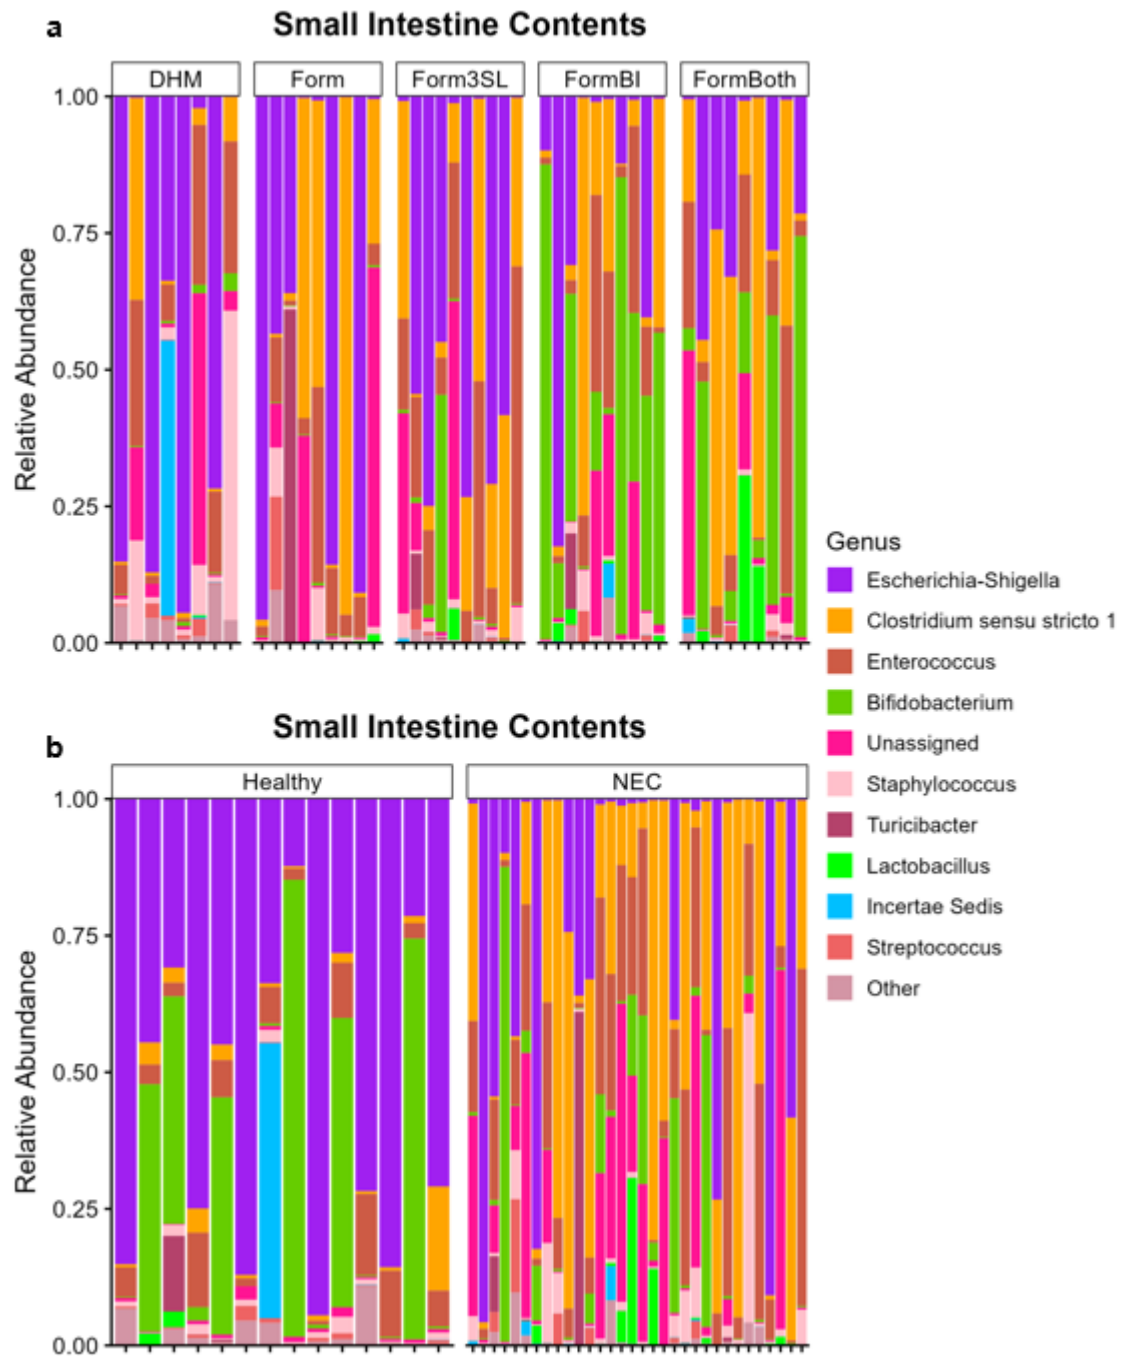

**Supplementary Figure S5.** Relative abundance by 16S sequencing of top 10 genera in small intestinal contents. **(a)** Relative abundance of top 10 genera present in small intestinal contents in all treatment groups (DHM (n=9), Form (n=8), Form3SL (n=9), FormBI (n=11), and FormBoth (n=10)). **(b)** Relative abundance of top 10 genera present in small intestinal contents in NEC (n=31) vs healthy (n=15) piglets.

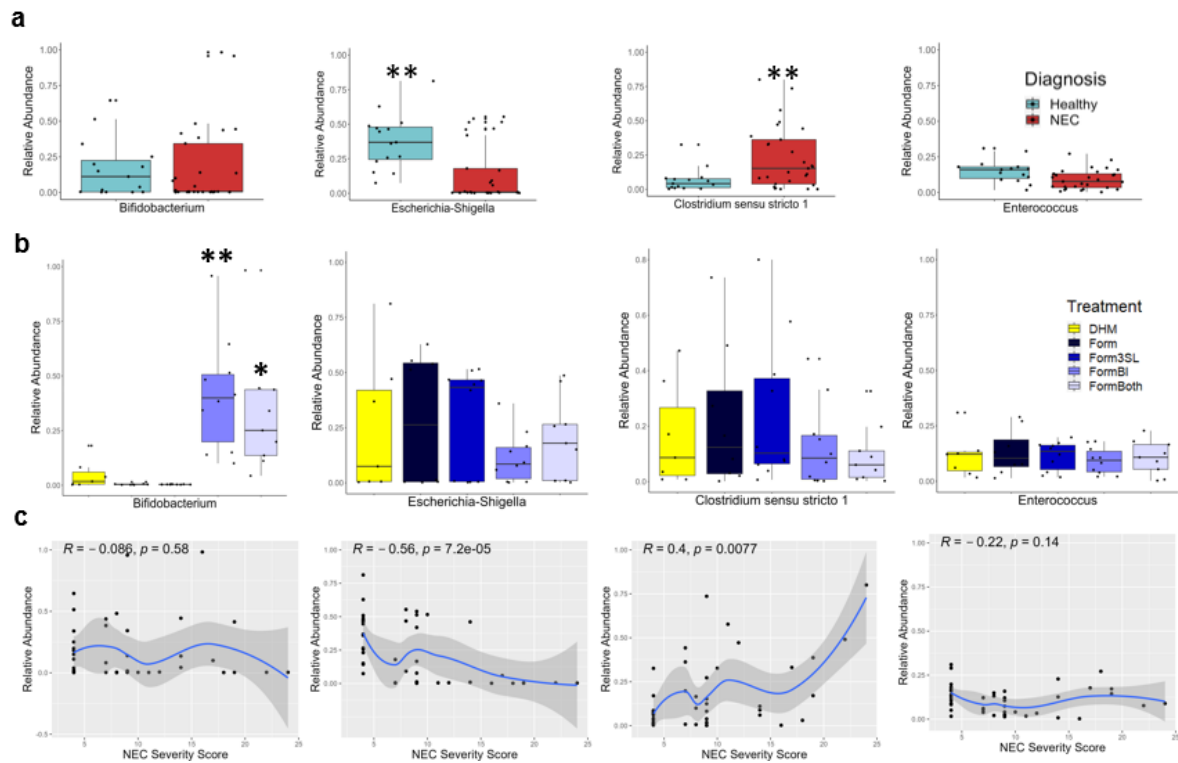

**Supplementary Figure S6.** Relative abundance and correlation with disease severity of top 3 most abundant genera in stomach contents by 16S sequencing. (a) Relative abundance of Bifidobacterium, Escherichia-Shigella, Clostridium sensu stricto 1, and Enterococcus genera in colon contents by diagnosis; P-value was determined using a Wilcoxon rank sum exact test; \*\*:p-value  $\leq 0.01$  healthy (n=15) vs NEC (n=31) (a). (b) Relative abundance of Bifidobacterium, Escherichia-Shigella, Clostridium sensu stricto 1, and Enterococcus genera in colon contents by treatment group; P-value was determined using Kruskal-Wallis multiple comparisons followed by p-value adjustment with the Benjamin-Hochberg method; \*\*:p-value  $\leq 0.01$  Form and Form3SL vs DHM (b). (DHM (n=9), Form (n=8), Form3SL (n=9), FormBI (n=11), and FormBoth (n=10)). (c) Spearman correlation of relative abundance of Bifidobacterium, Escherichia-Shigella, Clostridium sensu stricto 1, and Enterococcus with total NEC severity score (n=46).

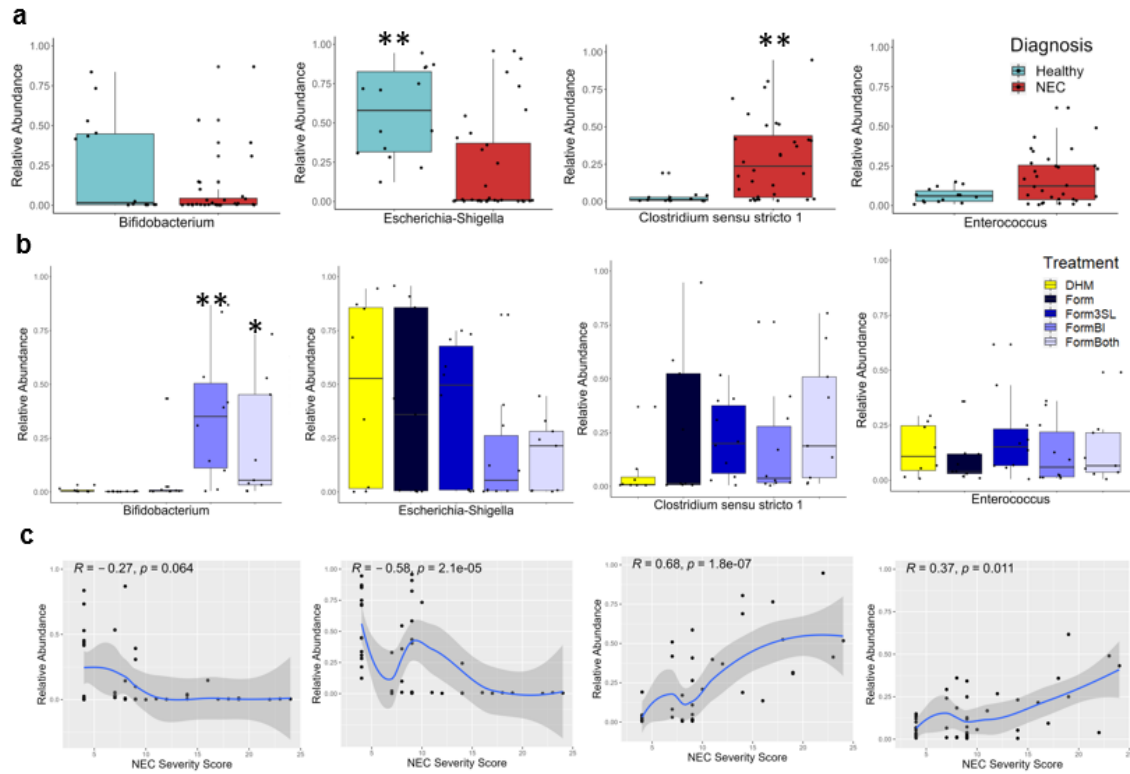

**Supplementary Figure S7.** Relative abundance and correlation with disease severity of top 3 most abundant genera in small intestinal contents by 16S sequencing. (a) Relative abundance of Bifidobacterium, Escherichia-Shigella, Clostridium sensu stricto 1, and Enterococcus genera in colon contents by diagnosis; P-value was determined using a Wilcoxon rank sum exact test; \*\*:p-value  $\leq 0.01$  healthy (n=15) vs NEC (n=31) (a). (b) Relative abundance of Bifidobacterium, Escherichia-Shigella, Clostridium sensu stricto 1, and Enterococcus genera in colon contents by treatment group; P-value was determined using Kruskal-Wallis multiple comparisons followed by p-value adjustment with the Benjamin-Hochberg method; \*\*:p-value  $\leq 0.01$  Form and Form3SL vs DHM (b). (DHM (n=9), Form (n=8), Form3SL (n=9), FormBI (n=11), and FormBoth (n=10)). (c) Spearman correlation of relative abundance of Bifidobacterium, Escherichia-Shigella, Clostridium sensu stricto 1, and Enterococcus with total NEC severity score (n=46).
